# Supplementary material for: Light Absorption Enhancement and Laser-Induced Damage Ability Improvement of Aluminum Alloy 6061 with Non-Porous Alumina/CdSe@Al2O3/SiO2 Functional Gradient Films
Source: MDPI journal article supplement (doi:10.3390/nano12030559), 2022-02-06
Supplement: s1 [file s1]

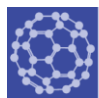

Supplementary Materials

# Light Absorption Enhancement and Laser-Induced Damage Ability Improvement of Aluminum Alloy 6061 with Non-Porous Alumina/CdSe@Al<sub>2</sub>O<sub>3</sub>/SiO<sub>2</sub> Functional Gradient Films

Jiaheng Yin, Lihua Lu, Yaowen Cui \*, Yongzhi Cao and Yunlong Du

Center for Precision Engineering, Harbin Institute of Technology, Harbin 150001, China;

larryyin@hit.edu.cn (J.Y.); lihual@hit.edu.cn (L.L.); cflying@hit.edu.cn (Y.C.); ylhit@hit.edu.cn (Y.D.)

\* Correspondence: yaowen.cui897@gmail.com; Tel.: +86-451-86412924; Fax: +86-451-86415244

The experimental system consists of a single longitudinal mode SAGA-S laser Nd:YAG laser, collimated light source, focusing lens, attenuator, aperture, an EPM2000 energy calorimeter, a sample carrier (two-dimensional adjustable, step-by-step accuracy is 10  $\mu$ m), an optical microscope and a computer. The experimental setup is depicted below.

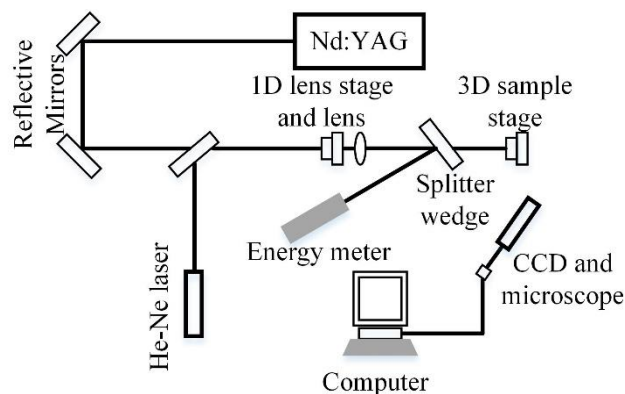

**Figure S1.** Schematics of laser irradiation damage testing equipment.

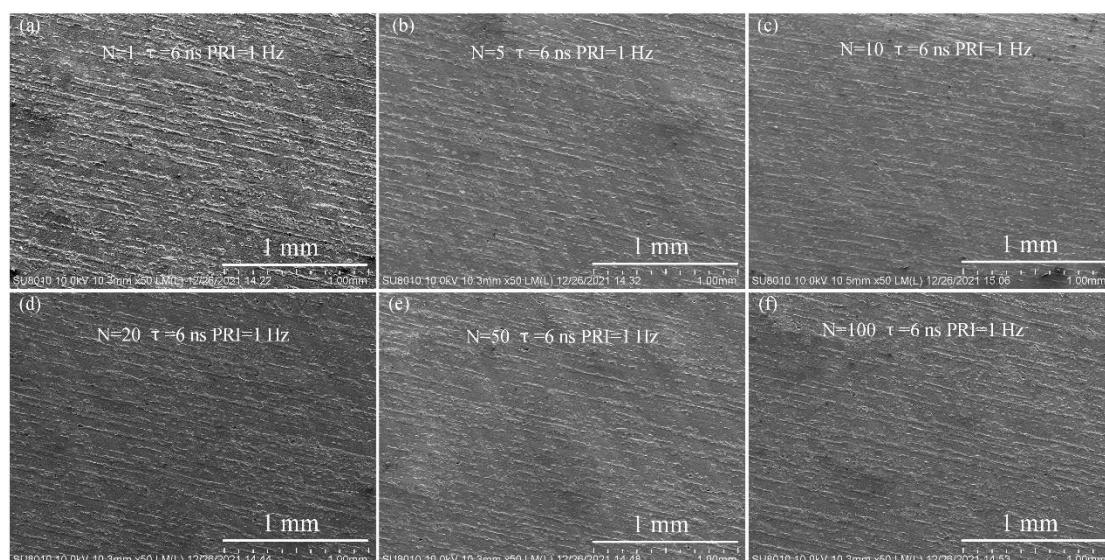

**Figure S2.** 355-nm Nd:YAG laser irradiation of aluminum alloy 6061 with functional layers at a fluence of 0.5 J/cm<sup>2</sup> at (a) 1 time, (b) 5 time, (c) 10 time, (d) 20 time, (e) 50 time, (f) 100 time irradiation.

**Table S1.** Particles generated by different laser irradiation times with laser fluence of 0.5 J/cm<sup>2</sup> of AA 6061 without functional layers.

| S. no | Diameters of particles (μm) |      |      |     |      |
|-------|-----------------------------|------|------|-----|------|
|       | 0.3                         | 0.5  | 1.0  | 5.0 | 10.0 |
| 1     | 2141                        | 572  | 199  | 3   | 0    |
| 2     | 10618                       | 4142 | 1127 | 25  | 1    |
| 3     | 1112                        | 252  | 52   | 0   | 0    |
| 4     | 5638                        | 1807 | 504  | 6   | 0    |
| 5     | 1957                        | 538  | 206  | 5   | 0    |
| 6     | 789                         | 144  | 30   | 0   | 0    |
| 7     | 2296                        | 561  | 145  | 2   | 0    |
| 8     | 2514                        | 689  | 193  | 9   | 1    |
| 9     | 2179                        | 459  | 116  | 5   | 0    |
| 10    | 1090                        | 215  | 62   | 2   | 0    |
| 11    | 488                         | 86   | 13   | 0   | 0    |
| 12    | 725                         | 115  | 18   | 0   | 0    |
| 13    | 451                         | 58   | 5    | 0   | 0    |
| 14    | 802                         | 115  | 20   | 1   | 0    |
| 15    | 2182                        | 495  | 156  | 9   | 0    |

**Table S2.** Particles generated by different laser irradiation times with laser fluence of 0.5 J/cm<sup>2</sup> with functional layers.

| S. no | Diameters of particles (μm) |     |     |
|-------|-----------------------------|-----|-----|
|       | 0.3                         | 0.5 | 1.0 |
| 1     | 77                          | 16  | 8   |
| 2     | 380                         | 89  | 32  |
| 3     | 103                         | 18  | 13  |
| 4     | 60                          | 21  | 18  |
| 5     | 87                          | 14  | 4   |
| 6     | 43                          | 8   | 4   |
| 7     | 38                          | 1   | 1   |
| 8     | 37                          | 4   | 2   |
| 9     | 20                          | 1   | 0   |
| 10    | 14                          | 1   | 0   |
| 11    | 21                          | 1   | 0   |
| 12    | 22                          | 4   | 1   |
| 13    | 24                          | 1   | 1   |
| 14    | 21                          | 0   | 0   |
| 15    | 24                          | 2   | 2   |
